# Supplementary material for: Beyond the marrow: insights from comprehensive next-generation sequencing of extramedullary multiple myeloma tumors
Source: PubMed Central journal article supplement (PMC11147761; doi:10.1038/s41375-024-02206-w), 2024-03-16
Supplement: 41375_2024_2206_MOESM2_ESM.pdf [file 41375_2024_2206_MOESM2_ESM.pdf]

Supplementary Table 1: Clinical characteristic of EMM patients

| Patient | Sex | ISS stage | Ig type | Light chain type | M protein level at diagnosis (g/l) | M protein level at EMM (g/l) | FLC at diagnosis (mg/l) | FLC at EMM (mg/l) | BMPCs at diagnosis measured by flow cytometry (%) | BMPCs at EMM measured by flow cytometry (%) | BMPCs at diagnosis measured by cytology (%) | BMPCs at EMM measured by cytology (%) | LDH at diagnosis ( $\mu$ kat/l) | LDH at EMM ( $\mu$ kat/l) |
|---------|-----|-----------|---------|------------------|------------------------------------|------------------------------|-------------------------|-------------------|---------------------------------------------------|---------------------------------------------|---------------------------------------------|---------------------------------------|---------------------------------|---------------------------|
| EMM01   | F   | 2         | IgA     | kappa            | 22.1                               | 15.5                         | 156.7                   | 526               | 52                                                | NA                                          | 48.4                                        | NA                                    | NA                              | 3.15                      |
| EMM02   | M   | 2         | IgA     | lambda           | 2.2                                | NA                           | 8073                    | 163               | NA                                                | NA                                          | 34                                          | NA                                    | 3.2                             | 8.6                       |
| EMM03   | M   | 1         | IgG     | kappa            | 3.8                                | 3.8                          | 47                      | 44                | 1.2                                               | 0                                           | 7.2                                         | 0                                     | 2.8                             | 3.44                      |
| EMM04   | M   | 2         | IgG     | lambda           | 41.6                               | 6                            | 226                     | 357               | NA                                                | 0                                           | NA                                          | 0.8                                   | 2.2                             | 5.69                      |
| EMM05   | M   | 1         | IgG     | Kappa            | 29.1                               | 7.48                         | 0.4                     | 12.64             | 44                                                | NA                                          | 36                                          | NA                                    | 2.6                             | 10.8                      |
| EMM06   | M   | 1         | IgG     | kappa            | 13.2                               | 5.06                         | 71.5                    | 63                | 4                                                 | NA                                          | 8.4                                         | NA                                    | 2.6                             | 4.8                       |
| EMM07   | M   | 2         | IgA     | kappa            | 18.1                               | 1.58                         | 1832                    | 585               | 16.5                                              | 3.2                                         | 45.2                                        | 8.4                                   | 5.3                             | 25.6                      |
| EMM08   | F   | 2         | IgG     | kappa            | 20.4                               | 17.12                        | 106                     | 65                | 21.8                                              | 0.3                                         | 22                                          | 3.2                                   | 2.87                            | 6.2                       |
| EMM09   | F   | 1         | IgA     | kappa            | 19.4                               | 24.54                        | 14.88                   | 26.6              | 27                                                | 36.6                                        | 38.4                                        | 57.2                                  | 4.32                            | 2.84                      |
| EMM10   | M   | 3         | IgG     | kappa            | 55.2                               | 0.1                          | 15.4                    | 1.56              | 62                                                | NA                                          | 75                                          | NA                                    | 7.5                             | 2.72                      |
| EMM11   | M   | 3         | IgA     | lambda           | 33.6                               | 13.18                        | 6.6                     | 6                 | 19                                                | 23                                          | 28.8                                        | 17.2                                  | 2.34                            | 4.72                      |
| EMM12   | M   | 2         | FLC     | kappa            | 0.1                                | NA                           | 307                     | 91                | 6.7                                               | 0.5                                         | 12.3                                        | 0.4                                   | 2.06                            | 4.1                       |
| EMM13   | M   | 1         | IgG     | lambda           | 11.5                               | 2.4                          | 381                     | 308               | 0.15                                              | 0                                           | 13                                          | 0.4                                   | 3.73                            | 3.41                      |
| EMM14   | F   | 3         | IgG     | lambda           | 47.5                               | 5.5                          | 5450                    | 174               | 46.8                                              | 1                                           | 66.8                                        | 2.8                                   | 8.27                            | 4.35                      |

| Supplementary Table 2: Treatment summary of EMM cohort prior sample collection |            |      |            |          |             |             |              |              |                        |              |                                                                 |
|--------------------------------------------------------------------------------|------------|------|------------|----------|-------------|-------------|--------------|--------------|------------------------|--------------|-----------------------------------------------------------------|
| Patient                                                                        | alkylators | ASCT | bortezomib | ixazomib | carfilzomib | thalidomide | lenalidomide | pomalidomide | daratumumab/isatuximab | others       | Number of previous lines of therapy before EMM/relapse sampling |
| EMM01                                                                          | ✓          |      |            |          | ✓           | ✓           | ✓            | ✓            | ✓                      | ibrutinib    | 6                                                               |
| EMM02                                                                          | ✓          | ✓    | ✓          | ✓        |             |             | ✓            |              | ✓                      |              | 3                                                               |
| EMM03                                                                          |            |      | ✓          |          |             |             |              |              |                        |              | 1                                                               |
| EMM04                                                                          | ✓          | ✓    | ✓          | ✓        |             | ✓           | ✓            | ✓            | ✓                      |              | 3                                                               |
| EMM05                                                                          | ✓          | ✓    | ✓          | ✓        |             | ✓           | ✓            | ✓            |                        | panobinostat | 5                                                               |
| EMM06                                                                          | ✓          | ✓    | ✓          |          | ✓           | ✓           | ✓            | ✓            |                        |              | 4                                                               |
| EMM07                                                                          | ✓          | ✓    | ✓          |          | ✓           | ✓           | ✓            |              | ✓                      |              | 5                                                               |
| EMM08                                                                          | ✓          | ✓    | ✓          |          |             | ✓           | ✓            |              | ✓                      |              | 2                                                               |
| EMM09                                                                          | ✓          | ✓    | ✓          |          |             | ✓           | ✓            | ✓            | ✓                      |              | 3                                                               |
| EMM10                                                                          | ✓          | ✓    | ✓          |          | ✓           | ✓           | ✓            |              |                        |              | 4                                                               |
| EMM11                                                                          | ✓          |      | ✓          |          |             | ✓           | ✓            |              |                        |              | 2                                                               |
| EMM12                                                                          |            |      | ✓          |          |             |             | ✓            |              |                        |              | 1                                                               |
| EMM13                                                                          | ✓          | ✓    | ✓          |          |             |             |              |              | ✓                      |              | 1                                                               |
| EMM14                                                                          |            |      | ✓          |          |             | ✓           | ✓            |              |                        |              | 1                                                               |

| Supplementary Table 3: Clinical characteristic of unpaired NDMM and RRMM cohort |            |             |
|---------------------------------------------------------------------------------|------------|-------------|
| Cohort                                                                          | NDMM (N=6) | RRMM (N=14) |
| Gender, No. (%)                                                                 |            |             |
| Man                                                                             | 4 (67)     | 6 (43)      |
| Woman                                                                           | 2 (33)     | 8 (57)      |
| ISS stage, No. (%)                                                              |            |             |
| I                                                                               | 4 (67)     | 6 (43)      |
| II                                                                              | 1 (17)     | 3 (21)      |
| III                                                                             | 1 (17)     | 5 (36)      |
| Cytogenetics, No. (%)                                                           |            |             |
| Standard risk                                                                   | 5 (83)     | 8 (57)      |
| High risk                                                                       | 1 (17)     | 6 (43)      |
| LDH, Median (min-max) [ $\mu$ kat/l]                                            |            |             |
| NA                                                                              | 1          |             |
| Ig type, No. (%)                                                                |            |             |
| IgG                                                                             | 3 (50)     | 12 (86)     |
| IgA                                                                             | 2 (33)     | 2 (14)      |
| LC only                                                                         | 0 (0)      | 0 (0)       |
| NA                                                                              | 1 (17)     | 0 (0)       |
| Light chain type, No. (%)                                                       |            |             |
| Kappa                                                                           | 2 (33)     | 11 (79)     |
| Lambda                                                                          | 4 (67)     | 3 (21)      |
| M protein, Median (min-max) [g/l]                                               |            |             |
| NA                                                                              | 1          | 0           |
| FLC, Median (min-max) [mg/l]                                                    |            |             |
| NA                                                                              | 1          | 1           |
| % BMPCs, Median (min-max) (flow)                                                |            |             |
| % BMPCs, Median (min-max) (cytology)                                            |            |             |
| NA                                                                              | 1          | 1           |

| Hugo_Symbol | Chromosome | Start_Position | Patient | sample | HGVSc          | HGVSp               | HGVSp_Short    | COSMIC       | dbSNP_RS     | CNT | n_alleles_with_mutation | n_allele_without_mutation | proportion_of_mutated_allele | CCF | VAF_from_RNAseq | total_reads_rnaseq |
|-------------|------------|----------------|---------|--------|----------------|---------------------|----------------|--------------|--------------|-----|-------------------------|---------------------------|------------------------------|-----|-----------------|--------------------|
| KRAS        | chr12      | 25227341       | EMM01   | EMM    | c.183A>T       | p.Gln61His          | p.Q61H         | COSV55499223 | rs17851045   | 2   | 1                       | 1                         | 0.5                          | 1   | 0.5             | 107                |
| STAG2       | chrX       | 124037543      | EMM01   | EMM    | c.305G>C       | p.Trp102Ser         | p.W102S        | NA           | novel        | 1   | 1                       | 0                         | 1                            | 1   | 1               | 109                |
| KRAS        | chr12      | 25245347       | EMM02   | EMM    | c.38G>A        | p.Gly13Asp          | p.G13D         | COSV55497388 | rs112445441  | 8   | 6                       | 2                         | 0.8                          | 1   | 0.8             | 282                |
| NRAS        | chr1       | 114713907      | EMM03   | EMM    | c.183A>T       | p.Gln61His          | p.Q61H         | COSV54736991 | rs121913255  | 1   | 1                       | 0                         | 1                            | 1   | 1               | 240                |
| KRAS        | chr12      | 25245350       | EMM04   | EMM    | c.35G>T        | p.Gly12Val          | p.G12V         | COSV55497419 | rs121913529  | 2   | 1                       | 1                         | 0.5                          | 1   | 0.5             | 39                 |
| TP53        | chr17      | 7674188        | EMM04   | EMM    | c.775G>T       | p.Asp259Tyr         | p.D259Y        | COSV52675732 | rs1567548929 | 1   | 1                       | 0                         | 1                            | 1   | 1               | 152                |
| EGFR        | chr7       | 55205537       | EMM05   | EMM    | c.3553G>T      | p.Gly1185Cys        | p.G1185C       | COSV51827170 | NA           | 4   | 3                       | 1                         | 0.8                          | 0.9 | 0               | 0                  |
| KRAS        | chr12      | 25245347       | EMM05   | EMM    | c.38G>A        | p.Gly13Asp          | p.G13D         | COSV55497388 | rs112445441  | 8   | 7                       | 1                         | 0.9                          | 1   | 0.9             | 19                 |
| NF1         | chr17      | 31235939       | EMM05   | EMM    | c.3892C>T      | p.Gln1298Ter        | p.Q1298*       | NA           | NA           | 2   | 1                       | 1                         | 0.5                          | 1   | 0               | 3                  |
| SMC1A       | chrX       | 53415029       | EMM05   | EMM    | c.250T>C       | p.Tyr84His          | p.Y84H         | NA           | novel        | 2   | 1                       | 1                         | 0.5                          | 1   | 1               | 9                  |
| SMC1A       | chrX       | 53415029       | EMM05   | NDMM   | c.250T>C       | p.Tyr84His          | p.Y84H         | NA           | novel        | 3   | 2                       | 1                         | 0.7                          | 0.9 | 0.9             | 28                 |
| ATM         | chr11      | 108302969      | EMM06   | EMM    | c.5441del      | p.Leu1814TrpfsTer14 | p.L1814Wfs*14  | NA           | novel        | 3   | 2                       | 1                         | 0.7                          | 1   | 0.2             | 20                 |
| FLT3        | chr13      | 28049751       | EMM06   | EMM    | c.766A>G       | p.Thr256Ala         | p.T256A        | NA           | novel        | 1   | 1                       | 0                         | 1                            | 1   | 0               | 0                  |
| FLT3        | chr13      | 28070603       | EMM06   | EMM    | c.52dup        | p.Ser18PhefsTer24   | p.S18Ffs*24    | NA           | novel        | 1   | 1                       | 0                         | 1                            | 1   | 0               | 0                  |
| MSH6        | chr2       | 47803501       | EMM06   | EMM    | c.3261del      | p.Phe1088SerfsTer2  | p.F1088Sfs*2   | COSV99029757 | rs267608078  | 1   | 1                       | 0                         | 1                            | 1   | 0.9             | 26                 |
| NF1         | chr17      | 31219018       | EMM06   | EMM    | c.1541_1542del | p.Gln514ArgfsTer43  | p.Q514Rfs*43   | COSV62194613 | rs267606600  | 1   | 1                       | 0                         | 1                            | 1   | 1               | 33                 |
| TP53        | chr17      | 7676047        | EMM06   | EMM    | c.322G>A       | p.Gly108Ser         | p.G108S        | COSV52862450 | rs587782461  | 1   | 1                       | 0                         | 1                            | 1   | 1               | 118                |
| TP53        | chr17      | 7676077        | EMM06   | EMM    | c.292C>T       | p.Pro98Ser          | p.P98S         | COSV52787732 | rs1597374015 | 1   | 1                       | 0                         | 1                            | 1   | 1               | 78                 |
| FLT3        | chr13      | 28070603       | EMM06   | NDMM   | c.52dup        | p.Ser18PhefsTer24   | p.S18Ffs*24    | NA           | novel        | 1   | 1                       | 0                         | 1                            | 1   | 0               | 0                  |
| KRAS        | chr12      | 25245345       | EMM06   | NDMM   | c.40G>A        | p.Val14Ile          | p.V14I         | COSV55501342 | rs104894365  | 2   | 2                       | 0                         | 1                            | 1   | 1               | 25                 |
| MSH6        | chr2       | 47803501       | EMM06   | NDMM   | c.3261del      | p.Phe1088SerfsTer2  | p.F1088Sfs*2   | COSV99029757 | rs267608078  | 2   | 2                       | 0                         | 1                            | 1   | 0.7             | 19                 |
| SMC1A       | chrX       | 53403591       | EMM06   | NDMM   | c.2395C>T      | p.Arg799Trp         | p.R799W        | COSV59129600 | NA           | 3   | 2                       | 1                         | 0.7                          | 1   | 0.9             | 78                 |
| TP53        | chr17      | 7676047        | EMM06   | NDMM   | c.322G>A       | p.Gly108Ser         | p.G108S        | COSV52862450 | rs587782461  | 1   | 1                       | 0                         | 1                            | 1   | 0.9             | 39                 |
| TP53        | chr17      | 7676077        | EMM06   | NDMM   | c.292C>T       | p.Pro98Ser          | p.P98S         | COSV52787732 | rs1597374015 | 1   | 1                       | 0                         | 1                            | 1   | 0.9             | 33                 |
| KRAS        | chr12      | 25245351       | EMM07   | EMM    | c.34G>C        | p.Gly12Arg          | p.G12R         | COSV55497582 | rs121913530  | 2   | 1                       | 1                         | 0.5                          | 0.9 | 0.4             | 180                |
| KRAS        | chr12      | 25245347       | EMM07   | NDMM   | c.38G>A        | p.Gly13Asp          | p.G13D         | COSV55497388 | rs112445441  | 2   | 1                       | 1                         | 0.5                          | 0.9 | 0.6             | 80                 |
| ERBB4       | chr2       | 211702093      | EMM08   | EMM    | c.1363G>A      | p.Ala455Thr         | p.A455T        | COSV99038372 | rs762866612  | 2   | 1                       | 1                         | 0.5                          | 0.9 | 0               | 0                  |
| KRAS        | chr12      | 25245347       | EMM08   | EMM    | c.38G>A        | p.Gly13Asp          | p.G13D         | COSV55497388 | rs112445441  | 2   | 1                       | 1                         | 0.5                          | 0.8 | 0.3             | 31                 |
| STAG2       | chrX       | 124094020      | EMM08   | EMM    | c.3581G>A      | p.Arg1194Gln        | p.R1194Q       | NA           | rs756126724  | 3   | 2                       | 1                         | 0.7                          | 0.8 | 0.003           | 333                |
| TP53        | chr17      | 7673781        | EMM08   | EMM    | c.839G>A       | p.Arg280Lys         | p.R280K        | COSV52666248 | rs121912660  | 1   | 1                       | 0                         | 1                            | 1   | 0.9             | 54                 |
| ERBB4       | chr2       | 211702093      | EMM08   | NDMM   | c.1363G>A      | p.Ala455Thr         | p.A455T        | COSV99038372 | rs762866612  | 2   | 1                       | 1                         | 0.5                          | 1   | na              | na                 |
| KRAS        | chr12      | 25245347       | EMM08   | NDMM   | c.38G>A        | p.Gly13Asp          | p.G13D         | COSV55497388 | rs112445441  | 2   | 1                       | 1                         | 0.5                          | 1   | na              | na                 |
| STAG2       | chrX       | 124094020      | EMM08   | NDMM   | c.3581G>A      | p.Arg1194Gln        | p.R1194Q       | NA           | rs756126724  | 3   | 2                       | 1                         | 0.7                          | 0.9 | na              | na                 |
| BRAF        | chr7       | 140753353      | EMM09   | EMM    | c.1902T>A      | p.Asp634Glu         | p.D634E        | COSV56082626 | rs121913337  | 2   | 1                       | 1                         | 0.5                          | 0.9 | 0               | 9                  |
| KRAS        | chr12      | 25227334       | EMM09   | EMM    | c.190T>G       | p.Tyr64Asp          | p.Y64D         | COSV55579983 | NA           | 2   | 1                       | 1                         | 0.5                          | 0.9 | 0.4             | 72                 |
| ATM         | chr11      | 108326163      | EMM10   | EMM    | c.6913C>T      | p.Gln2305Ter        | p.Q2305*       | NA           | rs1282099124 | 2   | 1                       | 1                         | 0.5                          | 0.8 | 1               | 8                  |
| FGFR3       | chr4       | 1801837        | EMM10   | EMM    | c.742C>T       | p.Arg248Cys         | p.R248C        | COSV53390662 | rs121913482  | 3   | 2                       | 1                         | 0.7                          | 0.7 | 1               | 1929               |
| ATM         | chr11      | 108326163      | EMM10   | NDMM   | c.6913C>T      | p.Gln2305Ter        | p.Q2305*       | NA           | rs1282099124 | 2   | 1                       | 1                         | 0.5                          | 0.9 | 0.7             | 25                 |
| FGFR3       | chr4       | 1801837        | EMM10   | NDMM   | c.742C>T       | p.Arg248Cys         | p.R248C        | COSV53390662 | rs121913482  | 3   | 2                       | 1                         | 0.7                          | 0.9 | 1               | 2152               |
| KRAS        | chr12      | 25245350       | EMM11   | EMM    | c.35G>T        | p.Gly12Val          | p.G12V         | COSV55497419 | rs121913529  | 3   | 2                       | 1                         | 0.7                          | 1   | 0.5             | 205                |
| FGFR3       | chr4       | 1801726        | EMM11   | NDMM   | c.722A>G       | p.Tyr241Cys         | p.Y241C        | COSV53427887 | NA           | 2   | 1                       | 1                         | 0.5                          | 0.4 | 0.4             | 607                |
| KRAS        | chr12      | 25245350       | EMM11   | NDMM   | c.35G>T        | p.Gly12Val          | p.G12V         | COSV55497419 | rs121913529  | 2   | 1                       | 1                         | 0.5                          | 0.3 | 0.2             | 29                 |
| KRAS        | chr12      | 25245351       | EMM11   | NDMM   | c.34G>T        | p.Gly12Cys          | p.G12C         | COSV55497469 | rs121913530  | 2   | 1                       | 1                         | 0.5                          | 0.2 | 0               | 29                 |
| ATR         | chr3       | 142550155      | EMM12   | EMM    | c.2953C>A      | p.Pro985Thr         | p.P985T        | COSV63390816 | NA           | 2   | 1                       | 1                         | 0.5                          | 1   | 0.7             | 12                 |
| HRAS        | chr11      | 534285         | EMM12   | EMM    | c.38G>T        | p.Gly13Val          | p.G13V         | COSV54237051 | rs104894226  | 3   | 2                       | 1                         | 0.7                          | 1   | 0.8             | 52                 |
| NRAS        | chr1       | 114713909      | EMM12   | EMM    | c.181C>A       | p.Gln61Lys          | p.Q61K         | COSV54736310 | rs121913254  | 2   | 1                       | 1                         | 0.5                          | 1   | 0.5             | 285                |
| TP53        | chr17      | 7674872        | EMM12   | EMM    | c.659A>G       | p.Tyr220Cys         | p.Y220C        | COSV52661282 | rs121912666  | 2   | 2                       | 0                         | 1                            | 1   | 1               | 111                |
| KRAS        | chr12      | 25225628       | EMM13   | EMM    | c.436G>C       | p.Ala146Pro         | p.A146P        | COSV55541748 | rs121913527  | 1   | 1                       | 0                         | 1                            | 1   | 1               | 86                 |
| TP53        | chr17      | 7673828        | EMM13   | EMM    | c.787_792del   | p.Asn263_Leu264del  | p.N263_L264del | NA           | novel        | 2   | 2                       | 0                         | 1                            | 1   | 1               | 120                |
| KRAS        | chr12      | 25227342       | EMM14   | EMM    | c.182A>T       | p.Gln61Leu          | p.Q61L         | COSV55504296 | rs121913240  | 3   | 2                       | 1                         | 0.7                          | 1   | 0.7             | 29                 |
| KRAS        | chr12      | 25227342       | EMM14   | NDMM   | c.182A>T       | p.Gln61Leu          | p.Q61L         | COSV55504296 | rs121913240  | 3   | 2                       | 1                         | 0.7                          | 1   | 0.6             | 93                 |

Supplementary Table 5: Univariate, multivariate cox model and competing risk model predicting the risk of EMM development using co

| Baseline characteristics |                          | N (%)      | Hazard Ratio                     |                                  |                                  |
|--------------------------|--------------------------|------------|----------------------------------|----------------------------------|----------------------------------|
|                          |                          |            | CPH univariable                  | CPH multivariable                | competing risks multivariable    |
| age                      | ≤ 65                     | 447 (63.9) | -                                | -                                | -                                |
|                          | > 65                     | 252 (36.1) | 1.49 (0.99-2.25, p=0.058)        | 1.44 (0.94-2.20, p=0.097)        | 1.39 (0.90-2.15, p=0.140)        |
| ISS stage                | 1                        | 269 (38.5) | -                                | -                                | -                                |
|                          | 2                        | 246 (35.2) | 0.86 (0.52-1.42, p=0.557)        | 0.79 (0.48-1.33, p=0.380)        | 0.78 (0.47-1.29, p=0.330)        |
|                          | 3                        | 184 (26.3) | 1.36 (0.83-2.22, p=0.219)        | 1.14 (0.69-1.90, p=0.610)        | 1.06 (0.64-1.76, p=0.830)        |
| LDH level                | Normal                   | 383 (54.8) | -                                | -                                | -                                |
|                          | Low                      | 182 (26.0) | 0.87 (0.53-1.41, p=0.567)        | 0.89 (0.54-1.45, p=0.631)        | 0.91 (0.56-1.47, p=0.690)        |
|                          | High                     | 134 (19.2) | 0.91 (0.51-1.62, p=0.745)        | 0.94 (0.52-1.69, p=0.837)        | 0.92 (0.51-1.67, p=0.790)        |
| 1q21 gain/amp + mut KRAS | absent                   | 314 (44.9) | -                                | -                                | -                                |
|                          | 1q21 gain/amp            | 208 (29.8) | 1.52 (0.92-2.52, p=0.101)        | 1.39 (0.83-2.33, p=0.209)        | 1.37 (0.83-2.24, p=0.220)        |
|                          | 1q21 gain/amp + mut KRAS | 53 (7.6)   | <b>2.73 (1.43-5.23, p=0.002)</b> | <b>2.41 (1.23-4.73, p=0.011)</b> | <b>2.36 (1.22-4.58, p=0.011)</b> |
|                          | mut KRAS                 | 124 (17.7) | 1.40 (0.77-2.52, p=0.270)        | 1.40 (0.77-2.54, p=0.267)        | 1.41 (0.79-2.53, p=0.250)        |
| del 13q                  | absent                   | 352 (50.4) | -                                | -                                | -                                |
|                          | present                  | 347 (49.6) | 1.33 (0.88-2.01, p=0.178)        | 1.22 (0.79-1.87, p=0.374)        | 1.17 (0.78-1.75, p=0.450)        |
| del17p                   | absent                   | 629 (90.0) | -                                | -                                | -                                |
|                          | present                  | 70 (10.0)  | 0.78 (0.36-1.69, p=0.531)        | 0.80 (0.36-1.76, p=0.581)        | 0.80 (0.37-1.72, p=0.570)        |
